# Supplementary material
Source: Springer Nature journal article supplement (https://www.springermedizin.de/resource/supplementary/12889_2010_3132_MOESM2_ESM.pdf/9488236)

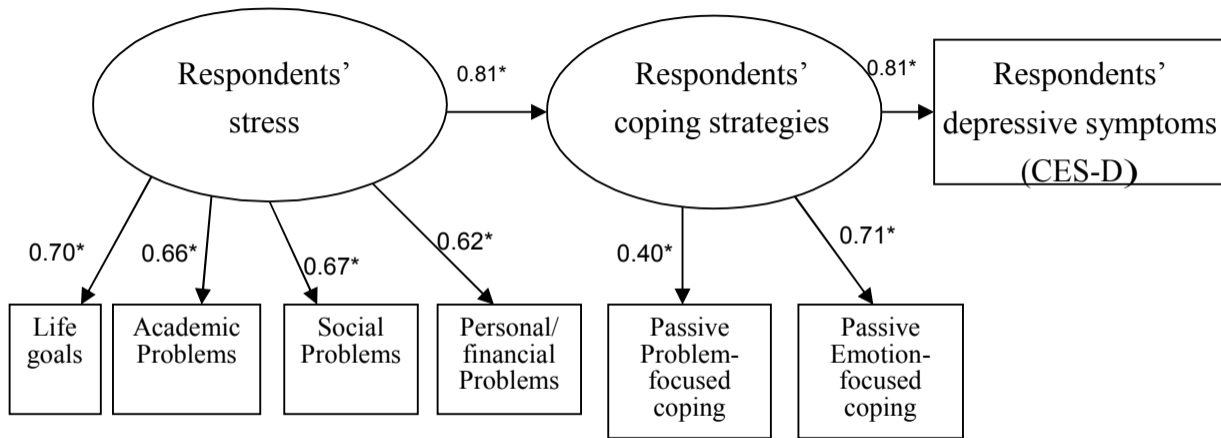

$*p < 0.01$

Supplement: MOESM2 [file 9488236]
